# Supplementary material for: Viable EdnraY129F mice feature human mandibulofacial dysostosis with alopecia (MFDA) syndrome due to the homologue mutation
Source: PubMed Central journal article supplement (PMC5110705; doi:10.1007/s00335-016-9664-5), 2016-09-26

**Figure S1. Decreased acoustic startle reactivity in *Ednra*<sup>Y129F/Y129F</sup> mice.**

Both male (A) and female (B) *Ednra*<sup>Y129F/Y129F</sup> mice show decreased acoustic startle reactivity compared to *Ednra*<sup>+/+</sup>.

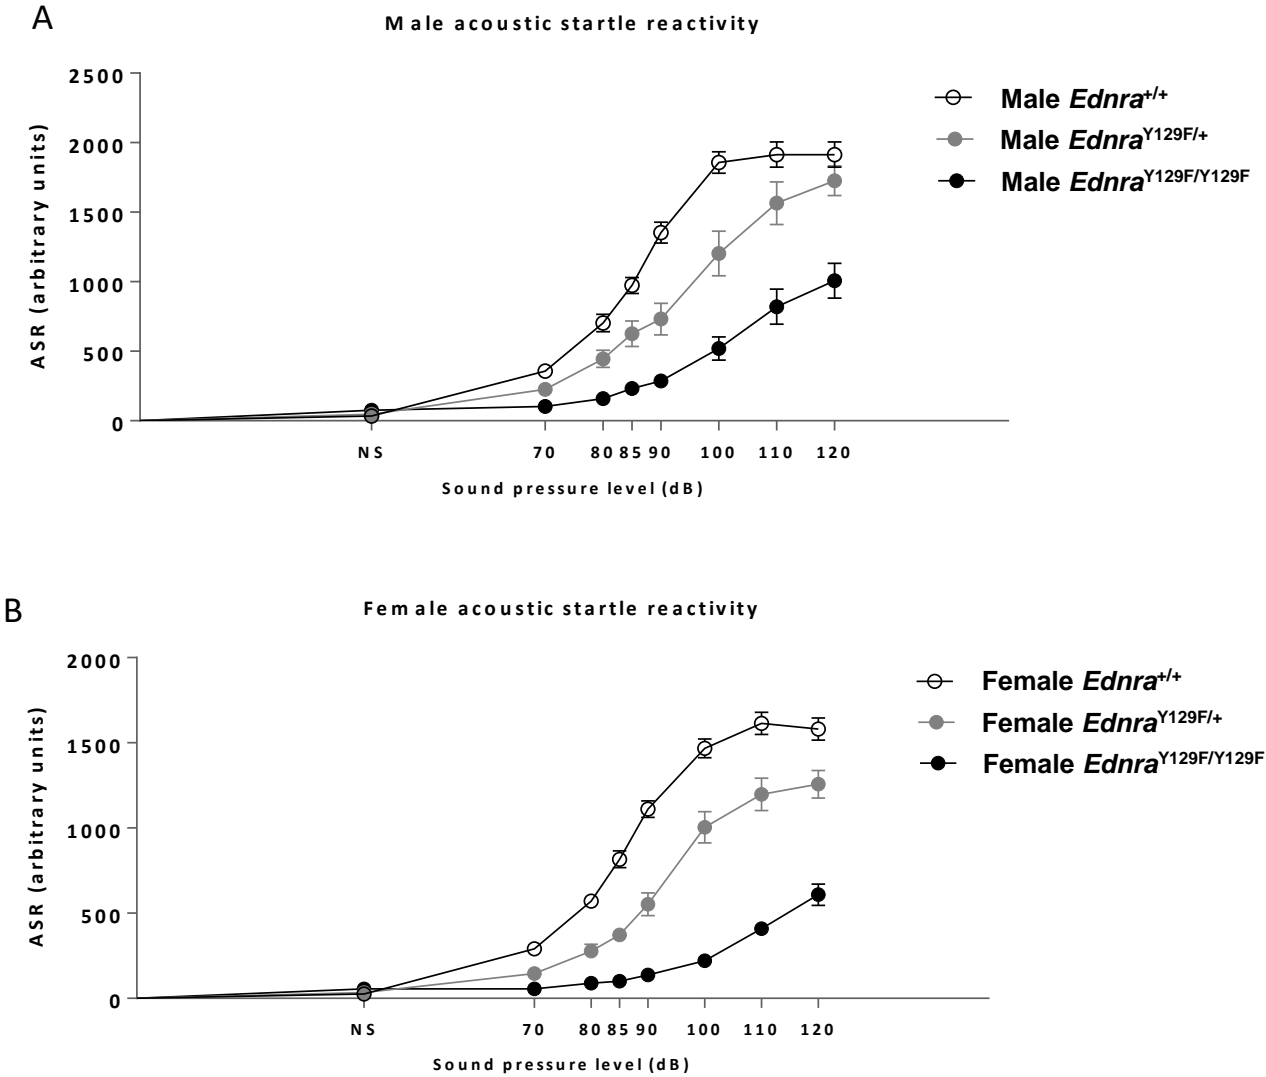

Supplement: 335_2016_9664_MOESM1_ESM.pdf [file 335_2016_9664_MOESM1_ESM.pdf]
