# Supplementary material for: Viable EdnraY129F mice feature human mandibulofacial dysostosis with alopecia (MFDA) syndrome due to the homologue mutation
Source: PubMed Central journal article supplement (PMC5110705; doi:10.1007/s00335-016-9664-5), 2016-09-26

**Figure S3. pQCT measurement of bone parameters in three, six, nine and twelve months old *Ednra*<sup>Y129F/+</sup> mice.**

Mean femur distal metaphyseal and midshaft diaphyseal bone area, BMC and BMD values for *Ednra*<sup>Y129F/+</sup> and *Ednra*<sup>+/+</sup> mice at three (n=10-12), six (n=7-13), nine (n=6-10) and twelve (n=5-11) months of age.

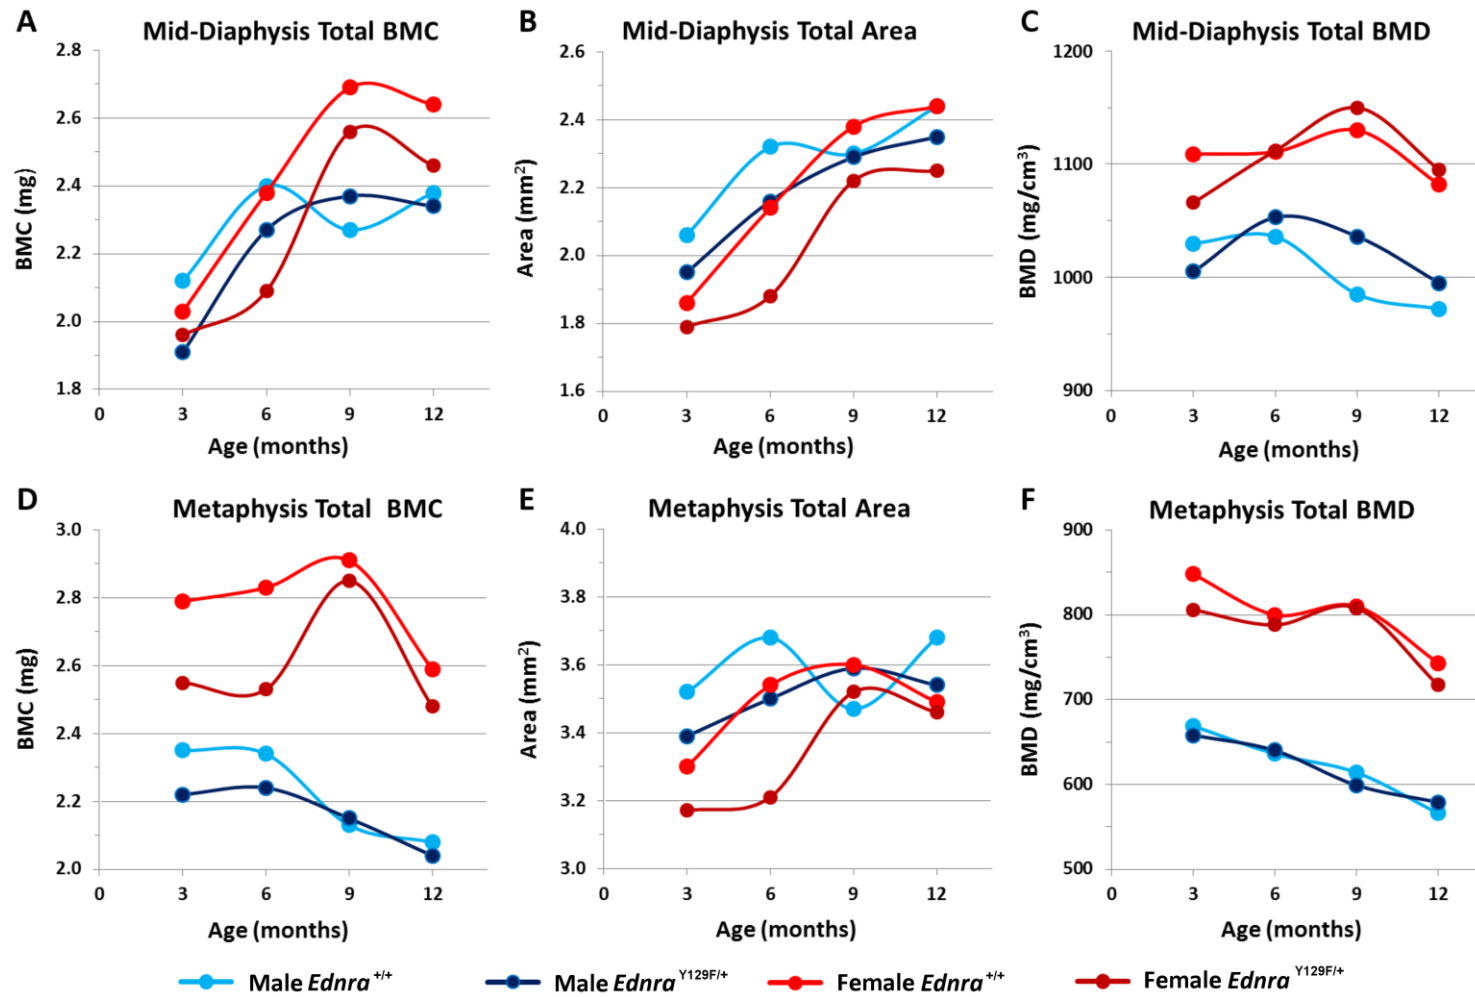

Supplement: 335_2016_9664_MOESM3_ESM.pdf [file 335_2016_9664_MOESM3_ESM.pdf]
